# Supplementary material for: Application of machine learning to predict the occurrence of arrhythmia after acute myocardial infarction
Source: Springer Nature journal article supplement (doi:10.1186/s12911-021-01667-8), 2021-11-02

First, we give the RF parameters in the table below.

Then three types of graphs related to RF features are listed: 1) feature importance ranking graph; 2) taking the average of the absolute value of each feature's SHAP as the feature importance, and obtaining a histogram; 3) reflecting each feature A honeycomb diagram of the importance of features.

| RF parameters    |      |
|------------------|------|
| Criterion        | Gini |
| Random state     | 35   |
| Max depth        | 3    |
| Min samples leaf | 6    |
| Max features     | 40   |
| N estimators     | 22   |

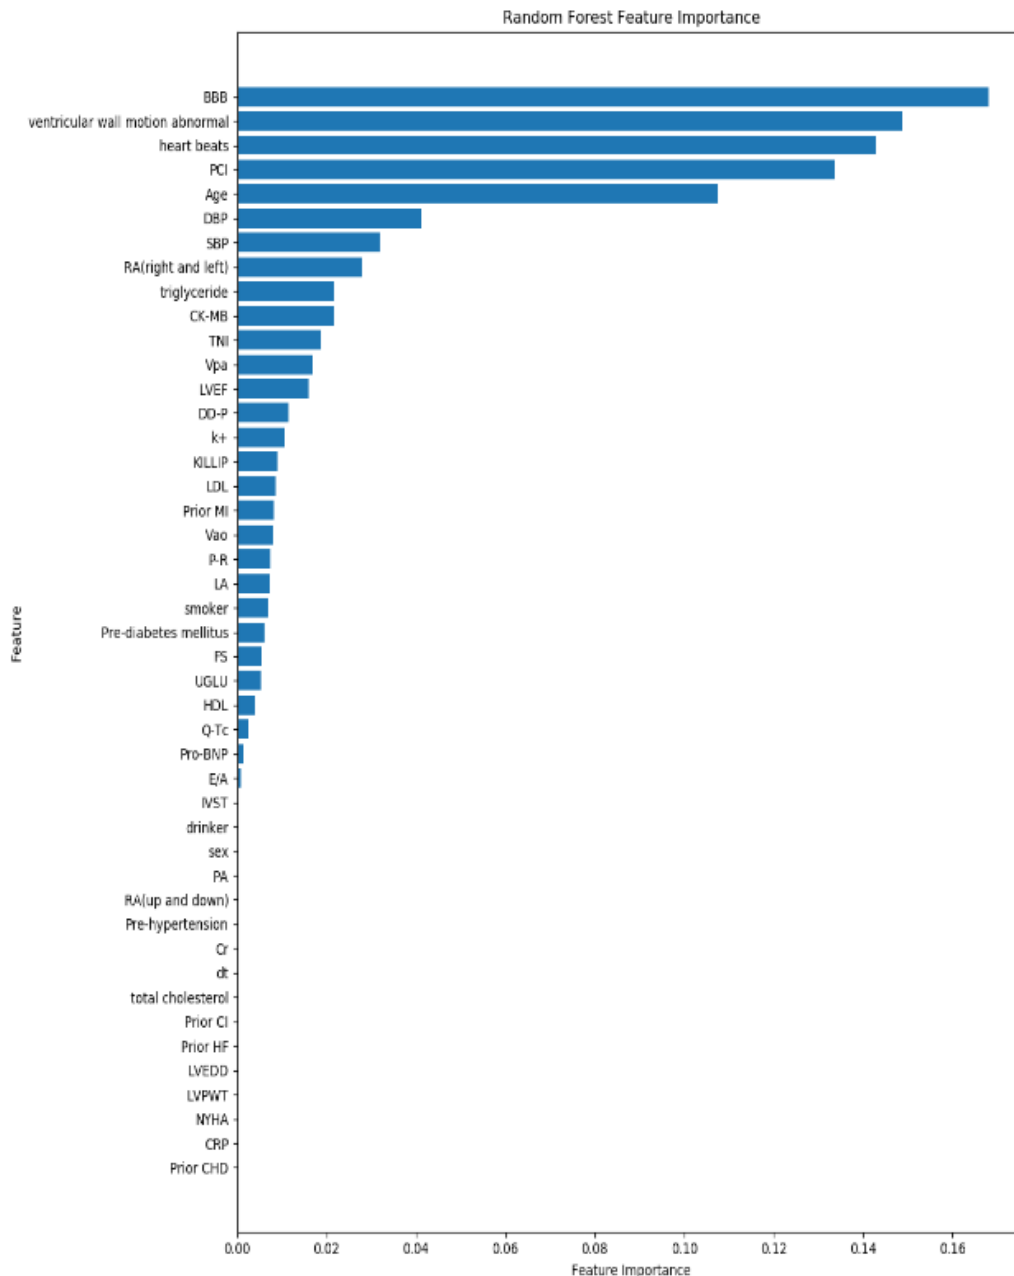

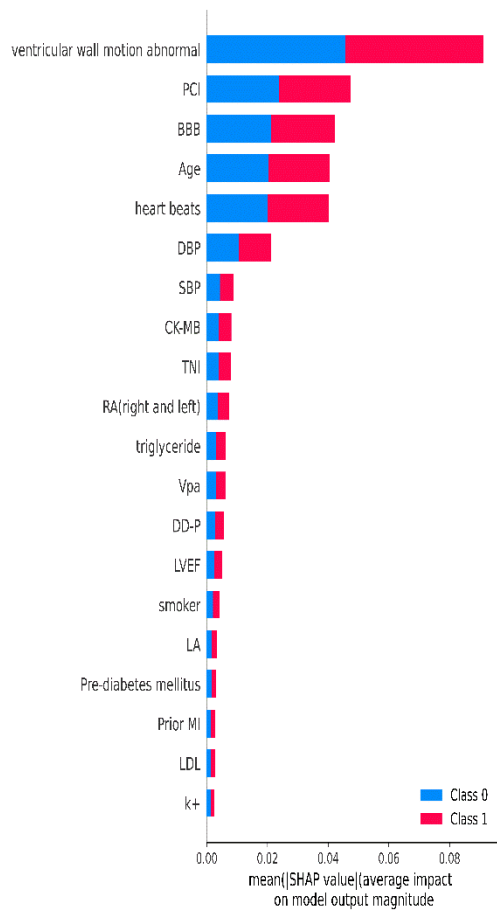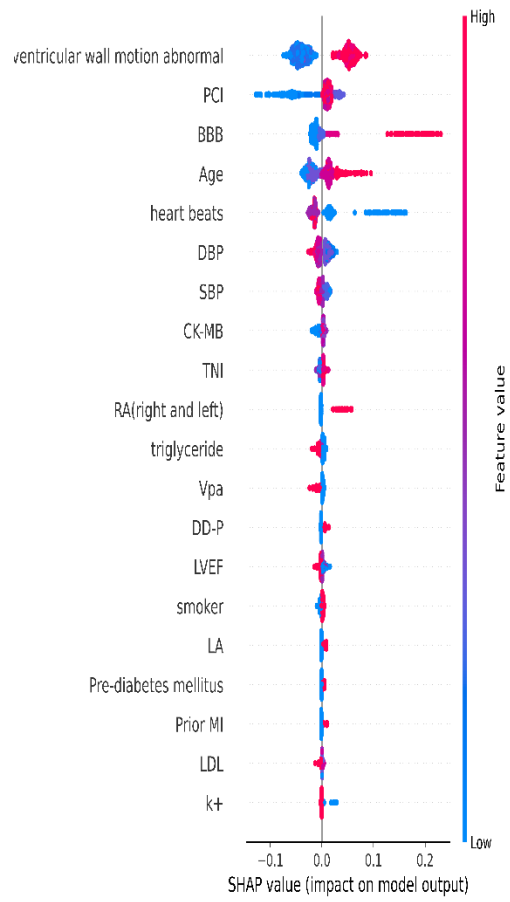

Supplement: 12911_2021_1667_MOESM2_ESM.pdf [file 12911_2021_1667_MOESM2_ESM.pdf]
