# Supplementary material for: Application of machine learning to predict the occurrence of arrhythmia after acute myocardial infarction
Source: BMC Med Inform Decis Mak. 2021 Nov 2;21:301. doi: 10.1186/s12911-021-01667-8 (PMC8560220; doi:10.1186/s12911-021-01667-8)
Supplement: Supplementary file 1 — Additional file 1. Convert continuous variables to ordinal categorical variables. [file 12911_2021_1667_MOESM1_ESM.xlsx]

## Sheet: Sheet1
Age	years			Sex	M/F			heart beat	beats/min			SBP	mmHg			DBP	mmHg
	＜30	0			male	1			＜50	0			＜80	0			＜60	0
	30-39	1			female	0			50-69	1			80-99	1			60-69	1
	40-49	2							70-89	2			100-119	2			70-79	2
	50-59	3							90-109	3			120-139	3			80-89	3
	60-69	4							110-149	4			140-159	4			90-99	4
	70-79	5							150-199	5			160-199	5			100-109	5
	80-89	6							≥200	6			≥200	6			≥110	6
	＞90	7
EF	%			FS	%			E/A				DT	ms			LVEDD	mm
	＜30	0			＜26	0			＜1	0			＜167	0			≤55	0
	30-44	1			≥26	1			≥1	1			167-231	1			＞55	1
	45-54	2											≥231	2
	≥55	3
LA	mm			RA(up-down)	mm			RA(left-right)	mm			PA	mm			Vpa	ms
	＜40	0			＜50	0			＜40	0			＜26	0			＜0.6	0
	≥40	1			≥50	1			≥40	1			≥26	1			0.6-0.9	1
																	＞0.9	2
IVST	mm			LVPWT	mm			Vao	ms			ventricular wall motion				CKMB	ug/l
	＜12	0			＜12	0			＜1	0			≥2 walls	0			＜25	0
	≥12	1			≥12	1			1-1.7	1			Anterior	1			25-41	1
									＞1.7	2			Apex	2			42-81	2
													Anteroseptal	3			82-164	3
													posterior	4			165-300	4
													inferior	5			＞300	5
													none	6
K+	mmol/L			Cr	umol/L			CRP	mg/L			TC	mmol/L			TG	mmol/L
	＜3.5	0			0-34.48	0			＜8	0			＜3.1	0			＜1.7	0
	3.5-5.0	1			35.36-69.84	1			≥8	1			3.1-4.1	1			1.7-2.3	1
	＞5.0	2			70.72-105.20	2							4.2-5.1	2			＞2.3	2
					106.08-140.55	3							5.2-7.2	3
					141.44-175.92	4							＞7.2	4
					176.8-352.72	5
					＞353.6	6
LDL	mmol/L			HDL	mmol/L			DDP	mg/L			PR	ms			QTc	ms
	＜1.8	0			≤1	0			＜0.55	0			＜0.12	0			＜340	0
	1.8-2.5	1			＞1	1			≥0.55	1			0.12-0.2	1			340-439	1
	2.6-3.3	2											＞0.2	2			≥440	2
	3.4-4.9	3
	＞4.9	4
TNI	ug/L			Pro-BNP	pg/mL			UGLU				BBB				PCI
	＜0.03	0			＜300	0			(-)	0			none	0			LAD	0
	0.03-1	1			300-449	1			1+	1			LAFB	1			LCX	1
	1.01-10	2			450-899	2			2+	2			LBBB	2			RCA	2
	10.01-50	3			900-1799	3			3+	3			LPFB	3			LM	3
	50.01-200	4			1800-4499	4			4+	4			RBBB	4			LAD+LCX	4
	＞200	5			4500-8999	5			(±)	5			LAFB+RBBB	5			LAD+RCA	5
					＞9000	6											RCA+LCX	6
																	Triple vessels	7
ALL
	Y	1
	N	0
