# Supplementary material for: Application of machine learning to predict the occurrence of arrhythmia after acute myocardial infarction
Source: BMC Med Inform Decis Mak. 2021 Nov 2;21:301. doi: 10.1186/s12911-021-01667-8 (PMC8560220; doi:10.1186/s12911-021-01667-8)
Supplement: Supplementary file 4 — Additional file 4. Differences in all 45 characteristics between the two groups. [file 12911_2021_1667_MOESM4_ESM.xlsx]

## Sheet: Table 1
Supplement 2 Comparison of basic characteristics between the two groups
arrhythmia
Characteristics	No(n=1224)				Yes(n=860)		P value
Demographics and history
Age,years	57.97±11.38				61.68±10.81		0.000**
Sex（male）, n (%)	942(76.96)				611(71.05)		0.002**
smoker, n (%)	737(60.31)				539(62.67)		0.276
drinker, n (%)	258(21.08)				173(20.12)		0.593
hypertension, n (%)	618(29.7%)				442(21.2%)		0.698
diabetes, n (%)	277(22.65)				214(24.88)		0.237
Prior MI, n (%)	86(7.03)				81(9.42)		0.048*
Prior CI, n (%)	115(9.40)				109(12.69)		0.017*
Prior HF, n (%)	5(0.41)				7(0.81)		0.228
Prior CHD, n (%)	47(3.84)				48(5.58)		0.061
At admission
Heart rate,beats/min	75(66,86)				72 (62,85)		0.000**
SBP,mmHg	130（117~150）				127（112~144）		0.000**
DBP,mmHg	83.84±15.86				79.59±16.68		0.000**
Killip,n(%)							0.057
I	24(1.2%)				16(0.8%)
II	121(5.8%)				101(4.8%)
III	33(1.6%)				40(1.9%)
IV	6(0.3%)				15(0.7%)
NYHA,n(%)							0.226
II~IV	23(1.1%)				15(0.7%)
Laboratory values
Pro-BNP（pg/mL）	1003.5(420.0,2207.0)				1202.0(482.0,2641.5)		0.003**
k+（mmol/L）	4.16(3.9,4.4)				4.18(3.9,4.5)		0.698
TNI（ug/L）	19.810(1.1,50.0)				30.785(2.0,54.0)		0.001**
CK-MB（ug/L）	74.0(25.4,161.6)				91.5(33.7,190.6)		0.001**
CRP（mg/L）	23.34±40.71				24.27±36.28		0.589
TC（mmol/L）	4.49±1.23				4.39±1.19		0.093
TG（mmol/L）	1.95±1.15				1.82±1.10		0.014*
HDL（mmol/L）	1.05±0.33				1.07±0.38		0.344
LDL（mmol/L）	3.00±0.89				2.93±0.87		0.084
Cr（umol/L）		75.88±37.08		79.88±42.88		0.027*
DD-P（mg/L）		0.66±3.01		0.87±3.35		0.129
UGLU						0.019*
(-),n(%)		861(70.34)		566(65.81)
(1+),n(%)		66(5.39)		56(6.51)
(2+),n(%)		39(3.19)		42(4.88)
(3+),n(%)		61(4.98)		56(6.51)
(4+),n(%)		128(10.46)		74(8.60)
(±) ,n(%)		69(5.64)		66(7.67)
Findings on ECG
BBB,n(%)						0.000**
LAFB,n(%)		214(17.48)		175(20.35)
LBBB,n(%)		22(1.80)		19(2.21)
LPFB,n(%)		49(4.00)		35(4.07)
RBBB,n(%)		25(2.04)		51(5.93)
LAFB+RBBB,n(%)		13(1.06)		27(3.14)
P-R（ms）		0.16(0.14,0.17)		0.16(0.15,0.19)		0.006
Q-Tc（ms）		439(418,462)		442(418,469)		0.014*
Echocardiographic Parameters
LVEF(%)		52.28±9.04		51.17±9.20		0.006**
FS(%)（		26.91±5.50		26.23±5.39		0.005**
E/A		0.90±0.37		0.93±0.38		0.071
Dt（ms）		170.64±45.92		167.98±44.56		0.187
LVEDD（mm）		49.0(47.0,52.0)		49.0(46.0,52.0)		0.317
IVST（mm）		9.6(9.0,10.4)		9.7(9.0,10.4)		0.473
LA（mm）		36.0(34.0,38.0)		36.0(34.0,39.0)		0.393
RA(up and down),mm		44.0(42.0,46.0)		45.0(42.0,46.0)		0.006**
RA(right and left),mm		34.0(32.0,35.0)		34.0(32.0,36.0)		0.003**
LVPWT(mm)		9.60±0.97		9.60±1.00		0.934
PA(mm)		23.97±1.95		24.10±2.02		0.149
Vao(ms)		1.0(1.0,1.1)		1.0(0.9,1.1)		0.513
Vpa(ms)		0.82±0.14		0.80±0.15		0.012*
ventricular wall motion abnormal,n(%)						0.000**
≥2 walls		270(22.06)		213(24.77)
Anterior		430(35.13)		217(25.23)
Apex		19(1.55)		3(0.35)
Anteroseptal		19(1.55)		2(0.23)
Posterior	148(12.09)		135(15.70)
Inferior	297(24.26)		268(31.16)
Angiographic Characteristics
Lesions vessels,n(%)			0.000**
LAD	262(21.41)		95(11.05)
LCX	46(3.76)		20(2.33)
RCA	78(6.37)		112(13.02)
LM	38(3.10)		35(4.07)
LAD+LCX	158(12.91)		64(7.44)
LAD+RCA	198(16.18)		166(19.30)
RCA+LCX	66(5.39)		60(6.98)
Triple vessels	378(30.88)		308(35.81)
